# Supplementary material for: Intra-Articular AAV9 α-l-Iduronidase Gene Replacement in the Canine Model of Mucopolysaccharidosis Type I
Source: Hindawi journal article supplement (doi:10.1155/2023/7419017), 2023-09-14
Supplement: f1 [file 7419017.f1.docx]

**SUPPLEMENTARY MATERIALS**
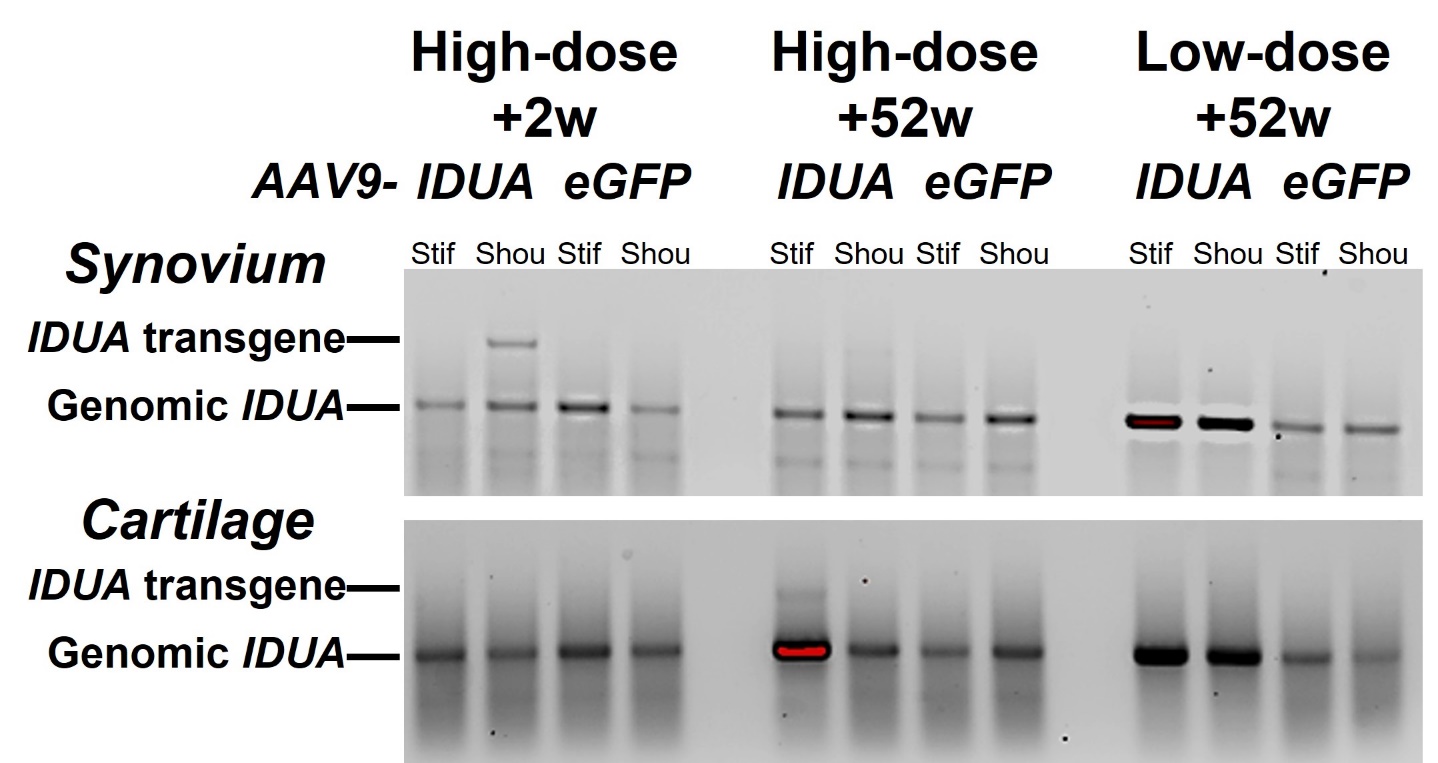


**Figure 1S**. **Synovial transgene and native *IDUA* PCRs**. All joints demonstrate presence of the genomic *IDUA* fragment; none of the AAV9-eGFP-treated joints demonstrate the *IDUA* transgene. In synovium, only the shoulder (and not the stifle) of the high-dose, +2w animal demonstrates presence of the *IDUA* transgene. Stif: Stifle; Shou: Shoulder.


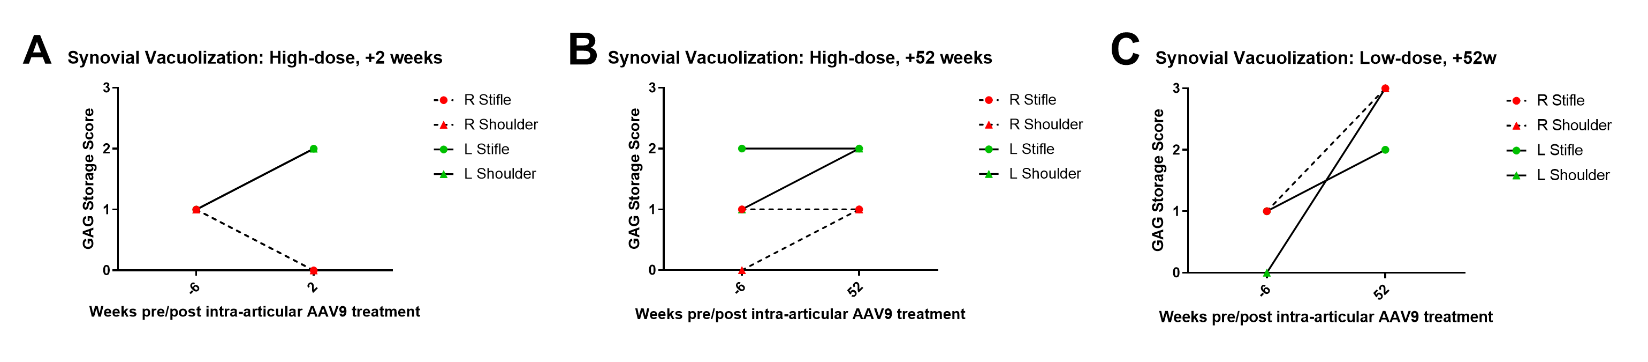


**Figure 2S. Synovial lysosomal storage scoring** (0, none; 1, mild; 2, moderate; 3, severe storage). Only in the high-dose, +2w animal (**A**) is there clearance of tissue storage at time of necropsy. There is mild lysosomal storage in **AAV9-*IDUA*** treated high-dose, +52w synovium (**B**), but development of severe lysosomal storage in **AAV9-*IDUA*** low-dose, +52w synovium (**C**).


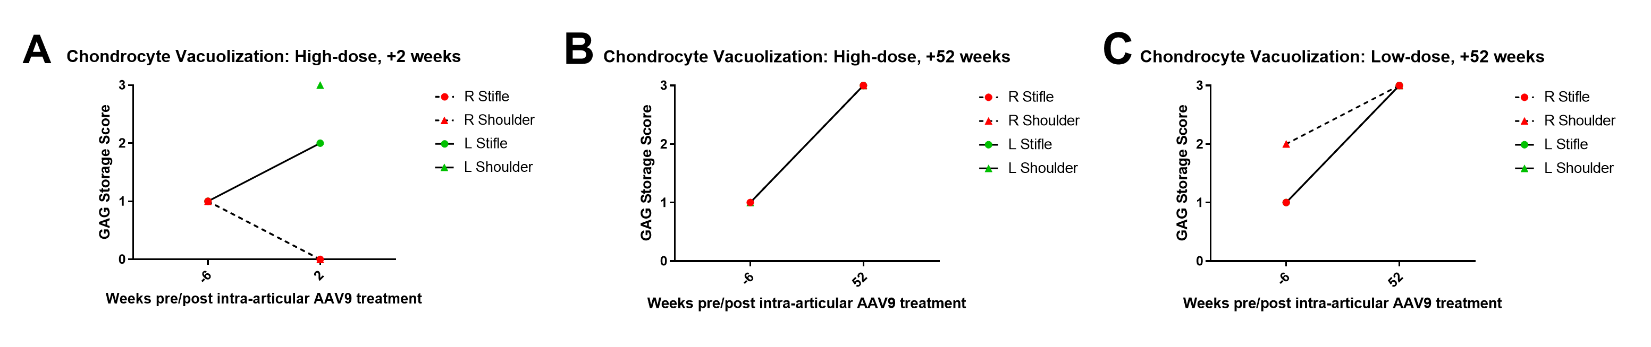


**Figure 3S. Chondrocyte lysosomal scoring**. (0, none; 1, mild; 2, moderate; 3, severe storage). Only in the high-dose, +2w animal (**A**) is there clearance of tissue storage at time of necropsy. There is severe lysosomal storage in both the high-dose, +52w (**B**) and low-dose, +52w (**C**) animals.
